# Supplementary material
Source: MDPI journal article supplement (https://www.mdpi.com/2313-0105/8/10/137)
Supplement: s1 [file s1]

# DFT Modelling of $\text{Li}_6\text{SiO}_4\text{Cl}_2$ Electrolyte Material for Li-ion Batteries

Navaratnarajah Kuganathan

Department of Materials, Faculty of Engineering, Imperial College London, London, SW7 2AZ, United Kingdom. n.kuganathan@imperial.ac.uk

The following equation combines formation energies of a Li vacancy and a Li interstitial to calculate the formation energy of Li Frenkel pair ( $\text{FP}_{\text{Li}}$ ). Similar equations were used for other Frenkel pairs.

$$E_{\text{for}}(\text{FP}_{\text{Li}}) = E_{\text{for}}(V'_{\text{Li}}) + E_{\text{for}}(\text{Li}_i^{\bullet}) \quad (1)$$

Formation energies of Schottky and anti-site defects were calculated using the following equations.

$$E_{\text{for}}(\text{Schottky}) = 6 E[V'_{\text{Li}}]_{1 \times 2 \times 2} + E[V''''_{\text{Si}}]_{1 \times 2 \times 2} + 4 E[V''_{\text{O}}]_{1 \times 2 \times 2} + 2 E[V_{\text{Cl}}^{\bullet}]_{1 \times 2 \times 2} - E[\text{Li}_6\text{SiO}_4\text{Cl}_2]_{1 \times 2 \times 2} - 13 E[\text{Li}_6\text{SiO}_4\text{Cl}_2]_{1 \times 2 \times 2} \quad (2)$$

$$E_{\text{for}}(\text{Li}_2\text{O Schottky}) = 2 E[V'_{\text{Li}}]_{1 \times 2 \times 2} + E[V''_{\text{O}}]_{1 \times 2 \times 2} + E(\text{Li}_2\text{O}) - 3 E[\text{Li}_6\text{SiO}_4\text{Cl}_2]_{1 \times 2 \times 2} \quad (3)$$

$$E_{\text{for}}(\text{LiCl Schottky}) = E[V'_{\text{Li}}]_{1 \times 2 \times 2} + E[V_{\text{Cl}}^{\bullet}]_{1 \times 2 \times 2} + E(\text{LiCl}) - 2 E[\text{Li}_6\text{SiO}_4\text{Cl}_2]_{1 \times 2 \times 2} \quad (4)$$

$$E_{\text{for}}(\text{SiO}_2\text{ Schottky}) = E[V''''_{\text{Si}}]_{1 \times 2 \times 2} + 2 E[V''_{\text{O}}]_{1 \times 2 \times 2} + E(\text{SiO}_2) - 3 E[\text{Li}_6\text{SiO}_4\text{Cl}_2]_{1 \times 2 \times 2} \quad (5)$$

$$E_{\text{for}}(\text{O/Cl anti - site})(\text{isolated}) = E[\text{O}'_{\text{Cl}}]_{1 \times 2 \times 2} + E[\text{Cl}_0^{\bullet}]_{1 \times 2 \times 2} - 2 E[\text{Li}_6\text{SiO}_4\text{Cl}_2]_{1 \times 2 \times 2} \quad (6)$$

$$E_{\text{for}}(\text{O/Cl anti - site})(\text{cluster}) = E[\text{O}'_{\text{Cl}}: \text{Cl}_0^{\bullet}]_{1 \times 2 \times 2} - E[\text{Li}_6\text{SiO}_4\text{Cl}_2]_{1 \times 2 \times 2} \quad (7)$$

where  $E[V'_{\text{Li}}]_{1 \times 2 \times 2}$ ,  $E[V''''_{\text{Si}}]_{1 \times 2 \times 2}$ ,  $E[V''_{\text{O}}]_{1 \times 2 \times 2}$  and  $E[V_{\text{Cl}}^{\bullet}]_{1 \times 2 \times 2}$  are the total energies of a  $1 \times 2 \times 2$  supercell consisting of a single Li, Si, O and Cl vacancy respectively.  $E[\text{O}'_{\text{Cl}}]_{1 \times 2 \times 2}$  and  $E[\text{Cl}_0^{\bullet}]_{1 \times 2 \times 2}$  are the total energies of a  $1 \times 2 \times 2$  supercell consisting of  $\text{O}'_{\text{Cl}}$  and  $\text{Cl}_0^{\bullet}$  defects respectively.

$E[\text{Li}_6\text{SiO}_4\text{Cl}_2]_{1 \times 2 \times 2}$  is the total energy of a  $1 \times 2 \times 2$  supercell.  $E[\text{Li}_6\text{SiO}_4\text{Cl}_2]$  is the total energy per formula unit of  $\text{Li}_6\text{SiO}_4\text{Cl}_2$ .

**Table S1.** Total energies of point defects calculated in the  $1 \times 2 \times 2$  supercell.

| Defect                    | Total energy (eV) |
|---------------------------|-------------------|
| <i>Vacancies</i>          |                   |
| V <sub>Li</sub> (1)       | −1132.45          |
| V <sub>Li</sub> (2)       | −1132.45          |
| V <sub>Li</sub> (3)       | −1132.45          |
| V <sub>Li</sub> (4)       | −1132.38          |
| <b>V<sub>Li</sub> (5)</b> | <b>−1132.50</b>   |
| V <sub>Li</sub> (6)       | −1132.50          |
| V <sub>O</sub> (1)        | <b>−1127.85</b>   |
| V <sub>O</sub> (2)        | −1127.85          |
| V <sub>O</sub> (3)        | −1127.85          |
| V <sub>O</sub> (4)        | −1132.85          |
| V <sub>Si</sub> (1)       | <b>−1118.17</b>   |
| V <sub>Cl</sub> (1)       | <b>−1132.32</b>   |
| V <sub>Cl</sub> (2)       | −1132.32          |
| <i>Interstitials</i>      |                   |
| Li <sub>i</sub> (1)       | −1138.96          |
| <b>Li<sub>i</sub> (2)</b> | <b>−1138.96</b>   |
| Li <sub>i</sub> (3)       | −1138.72          |
| Li <sub>i</sub> (4)       | −1138.91          |
| Li <sub>i</sub> (5)       | −1138.39          |
| Li <sub>i</sub> (6)       | −1138.90          |
| O <sub>i</sub> (1)        | −1142.75          |
| O <sub>i</sub> (2)        | −1142.68          |
| O <sub>i</sub> (3)        | −1142.84          |
| O <sub>i</sub> (4)        | −1141.49          |
| <b>O<sub>i</sub> (5)</b>  | <b>−1142.91</b>   |
| Cl <sub>i</sub> (1)       | <b>−1138.98</b>   |
| Cl <sub>i</sub> (2)       | −1139.92          |
| Cl <sub>i</sub> (3)       | −1138.74          |
| Cl <sub>i</sub> (4)       | −1138.23          |
| Si <sub>i</sub> (1)       | <b>−1139.34</b>   |
| Si <sub>i</sub> (2)       | −1138.31          |
| Si <sub>i</sub> (3)       | −1139.14          |
| Si <sub>i</sub> (4)       | −1139.23          |

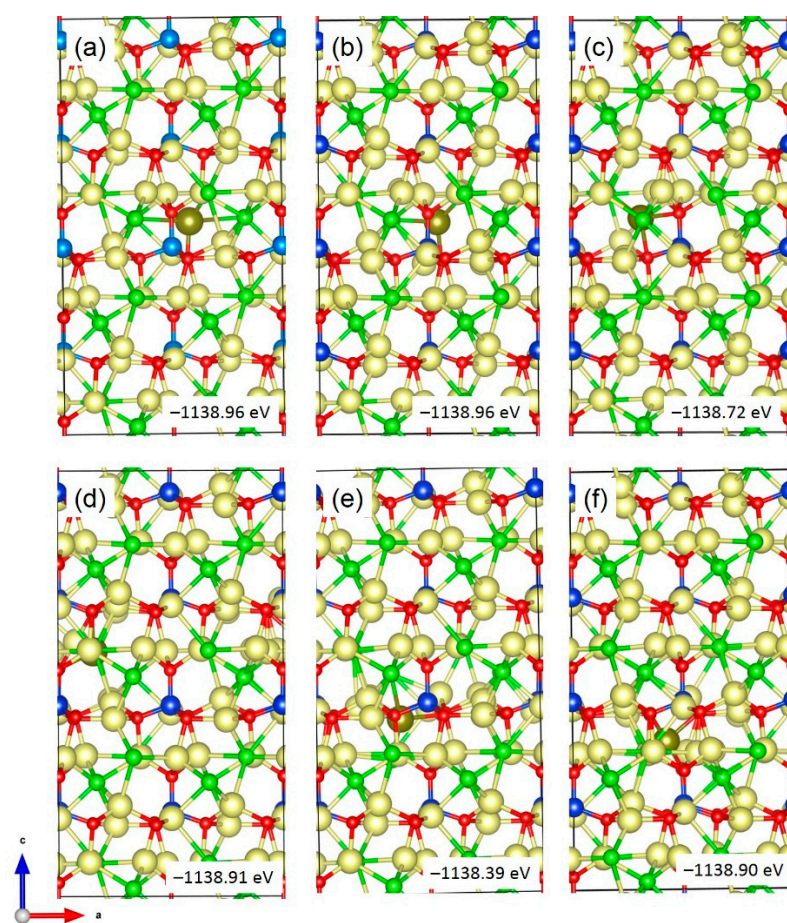

**Figure S1.** (a–f) Different configurations of a single Li incorporated into  $\text{Li}_6\text{SiO}_4\text{Cl}_2$ .

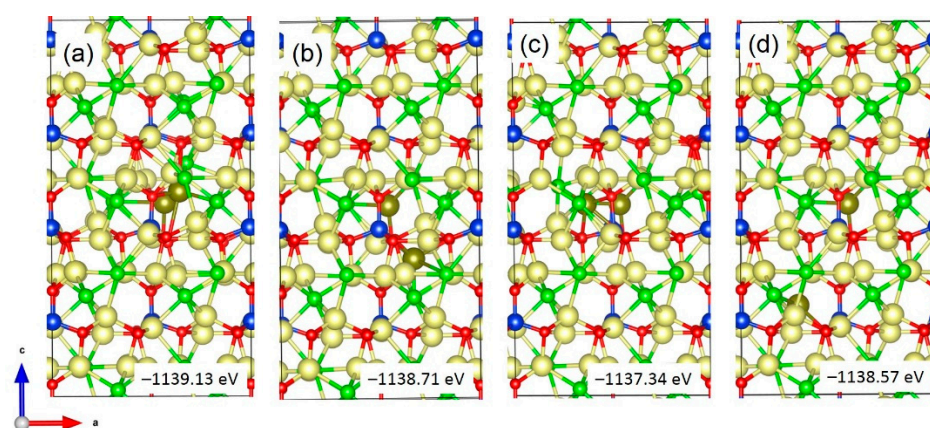

**Figure S2.** (a–d) Different configurations of two Li atoms incorporated into  $\text{Li}_6\text{SiO}_4\text{Cl}_2$ .

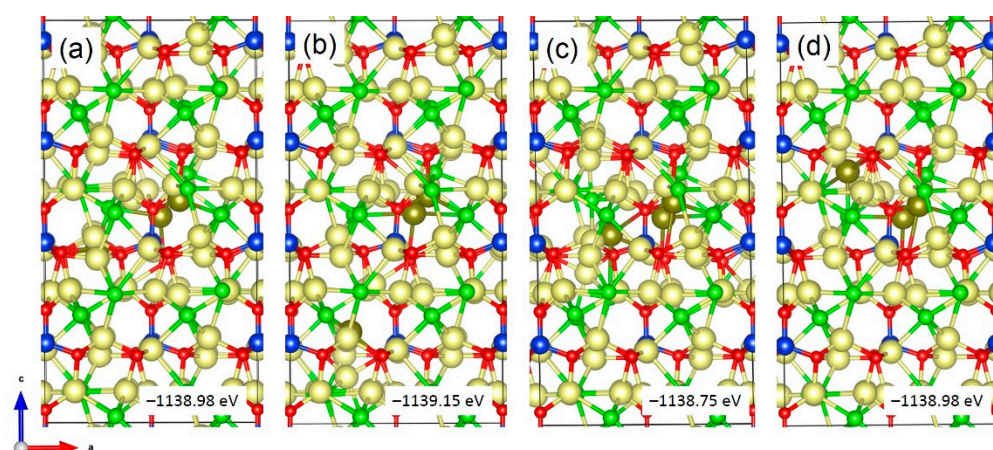

**Figure S3.** (a–d) Different configurations of three Li atoms incorporated into  $\text{Li}_6\text{SiO}_4\text{Cl}_2$ .
